# Supplementary material for: Mechanosensitive ion channel Piezo1 promotes prostate cancer development through the activation of the Akt/mTOR pathway and acceleration of cell cycle
Source: PubMed Central journal article supplement — Int J Oncol. 2019 Jul 15;55(3):629–44. doi: 10.3892/ijo.2019.4839 (PMC6685593; doi:10.3892/ijo.2019.4839), 2019-07-15

Figure S1. Tumor immunohistochemistry staining. The upper line shows representative HE staining of xenograft tumor. The bottom two lines show the immunostaining of Piezo1 and Ki67 among wide type DU145, control shRNA DU145 and Piezo1 shRNA1 DU145 groups, respectively. The expression of Piezo1 and Ki67 were significantly reduced by knockdown of Piezo1 during the tumor growth. Scale bar, 20  $\mu$ m. shRNA, short hairpin RNA; Piezo1, piezo type mechanosensitive ion channel component 1; HE, hematoxylin-eosin.

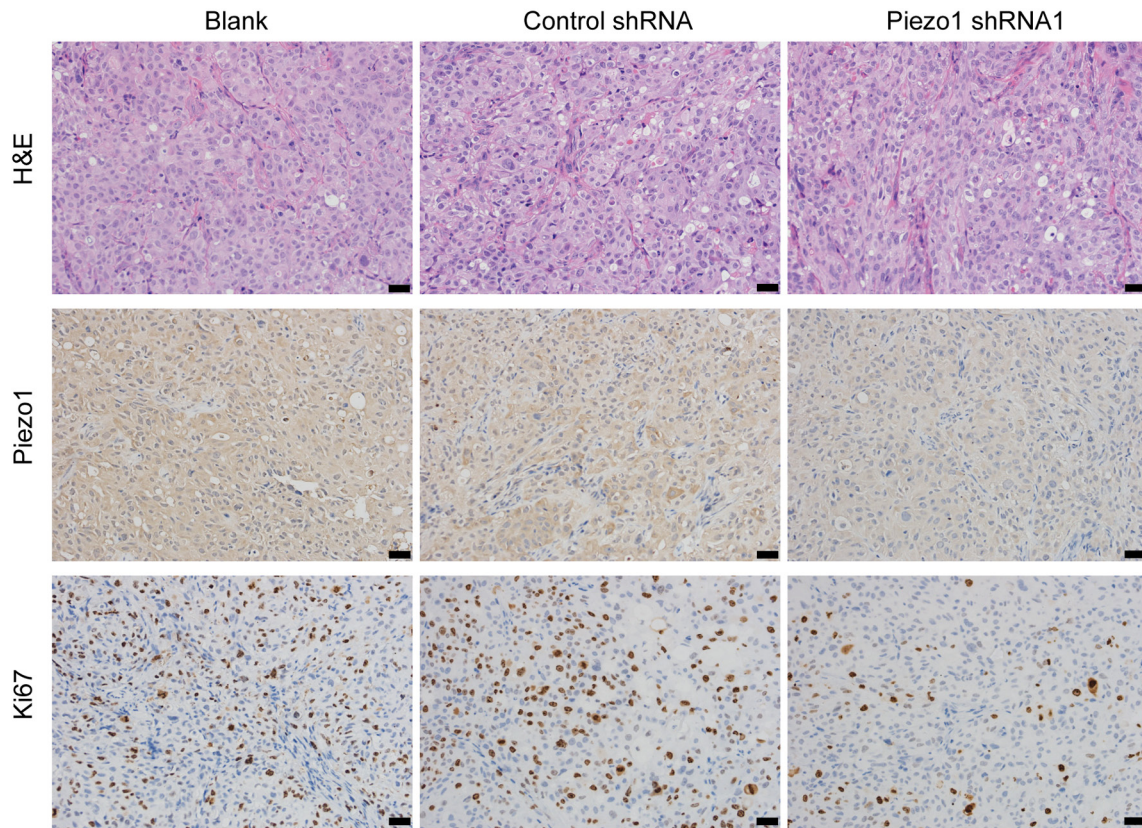

Supplement: Supplementary_Data.pdf [file Supplementary_Data.pdf]
